# Supplementary material for: Computational Investigation of a NASICON-Type Solid Electrolyte Material LiGe2(PO4)3
Source: MDPI journal article supplement (doi:10.3390/suschem3030025), 2022-09-07
Supplement: s1 [file s1]

# Computational Investigation of a NASICON-type Solid Electrolyte Material $\text{LiGe}_2(\text{PO}_4)_3$

Navaratnarajah Kuganathan <sup>1,\*</sup>, Kobiny Antony Rex <sup>2</sup> and Poobalasuntharam Iyngaran <sup>2</sup>

**Table S1.** Two body Buckingham potentials used for dopant oxides in  $\text{LiGe}_2(\text{PO}_4)_3$ .

| Interaction                       | A (eV)      | $\rho$ (Å) | C (eV·Å <sup>6</sup> ) | Y (e)  | K (eV·Å <sup>-2</sup> ) |
|-----------------------------------|-------------|------------|------------------------|--------|-------------------------|
| Na <sup>+</sup> –O <sup>2-</sup>  | 1497.830598 | 0.287483   | 0.00                   | 1.000  | 99,999                  |
| K <sup>+</sup> –O <sup>2-</sup>   | 1000.300    | 0.36198    | 10.56900               | 1.000  | 99,999                  |
| Rb <sup>+</sup> –O <sup>2-</sup>  | 1010.80     | 0.3793     | 0.000                  | 1.000  | 99,999                  |
| Al <sup>3+</sup> –O <sup>2-</sup> | 1114.9      | 0.3118     | 0.000                  | 3.000  | 99,999                  |
| Ga <sup>3+</sup> –O <sup>2-</sup> | 2901.12     | 0.2742     | 0.000                  | 1.000  | 99,999                  |
| Sc <sup>3+</sup> –O <sup>2-</sup> | 1575.85     | 0.3211     | 0.000                  | 3.000  | 99,999                  |
| In <sup>3+</sup> –O <sup>2-</sup> | 1495.65     | 0.3327     | 4.33                   | 3.000  | 99,999                  |
| Y <sup>3+</sup> –O <sup>2-</sup>  | 1345.10     | 0.3491     | 0.000                  | 3.000  | 99,999                  |
| Gd <sup>3+</sup> –O <sup>2-</sup> | 1885.75     | 0.3399     | 20.34                  | 3.000  | 99,999                  |
| La <sup>3+</sup> –O <sup>2-</sup> | 1545.21     | 0.3590     | 0.000                  | −0.250 | 145.0                   |
| Si <sup>4+</sup> –O <sup>2-</sup> | 1283.910    | 0.32052    | 10.66                  | 4.000  | 99,999                  |
| Sn <sup>4+</sup> –O <sup>2-</sup> | 1414.32     | 0.3479     | 13.66                  | 4.000  | 99,999                  |
| Ti <sup>4+</sup> –O <sup>2-</sup> | 5111.7      | 0.2625     | 0.00                   | −0.10  | 314.0                   |
| Zr <sup>4+</sup> –O <sup>2-</sup> | 985.869     | 0.3760     | 0.00                   | 1.35   | 169.617                 |
| Ce <sup>4+</sup> –O <sup>2-</sup> | 1986.83     | 0.3511     | 20.40                  | 7.70   | 291.75                  |
